# Supplementary material for: Parallel Genomics Uncover Novel Enterococcal-Bacteriophage Interactions
Source: PubMed Central journal article supplement (PMC7064774; doi:10.1128/mbio.03120-19), 2020-03-03

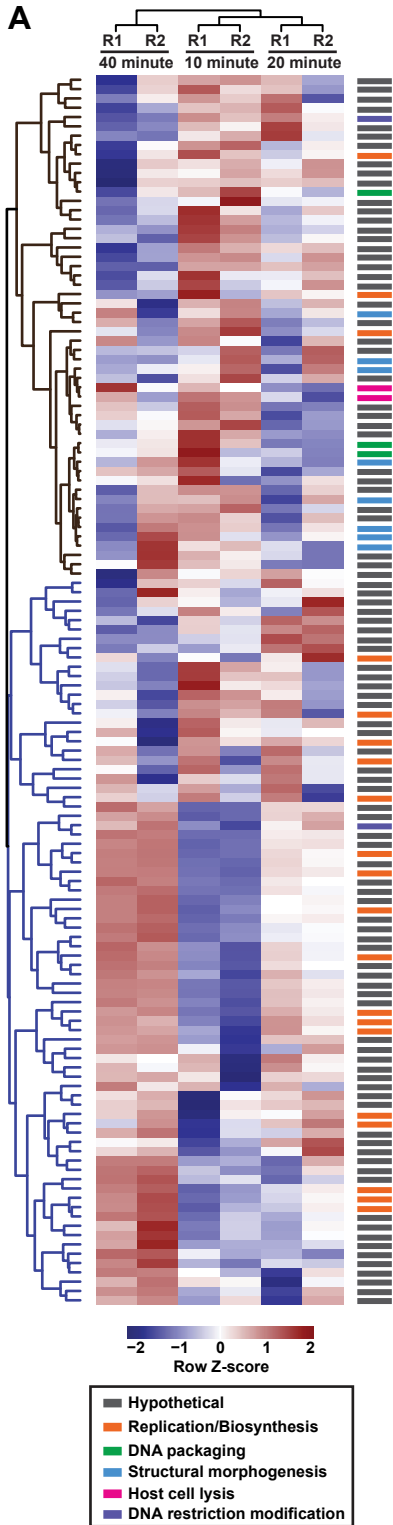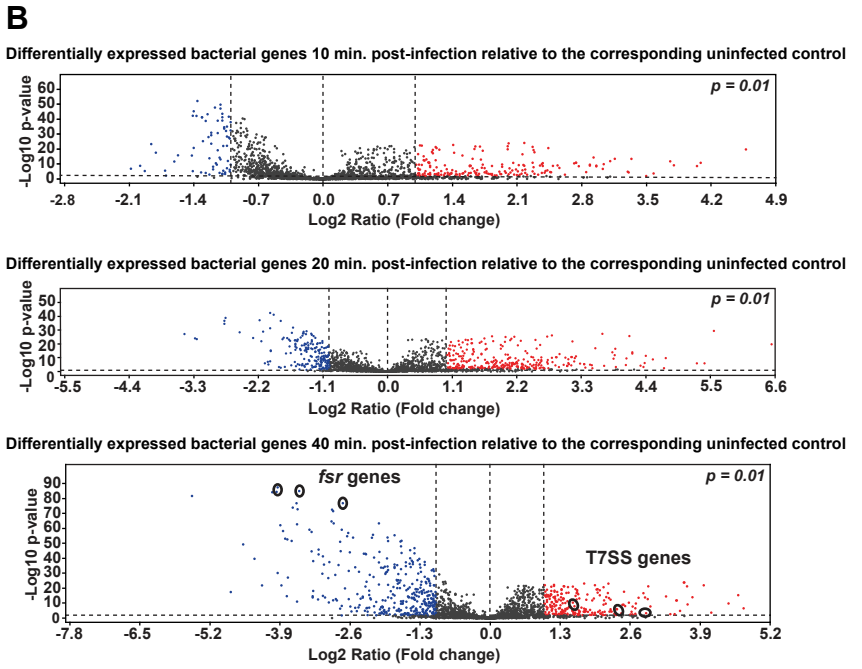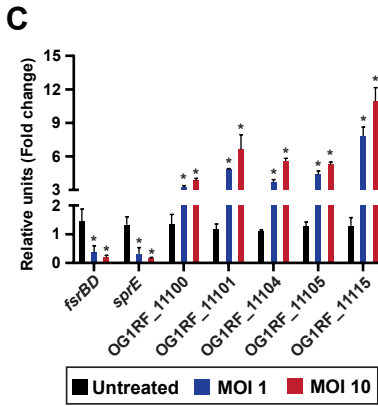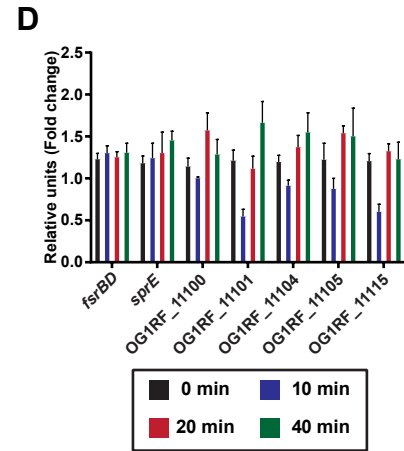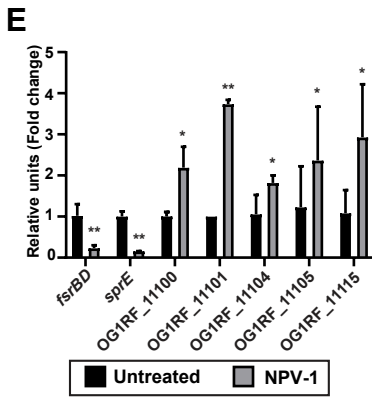

Supplement: mBio.03120-19-sf006.pdf [file mBio.03120-19-sf006.pdf]
