# Supplementary material for: Parallel Genomics Uncover Novel Enterococcal-Bacteriophage Interactions
Source: PubMed Central journal article supplement (PMC7064774; doi:10.1128/mbio.03120-19), 2020-03-03
Supplement: mBio.03120-19-st003.pdf [file mBio.03120-19-st003.pdf]

**Table S3. Bacterial strains, phages, plasmids and primers used in this study.**

| Strains, phages, plasmids and primers | Characteristics and/or description                                                                                                                                              | Reference /Source |
|---------------------------------------|---------------------------------------------------------------------------------------------------------------------------------------------------------------------------------|-------------------|
| <b><i>Enterococcus faecalis</i></b>   |                                                                                                                                                                                 |                   |
| OG1RF                                 | Human oral isolate; Rf <sup>R</sup> , Fa <sup>R</sup>                                                                                                                           | (1)               |
| <i>Δpip<sub>EF</sub></i>              | OG1RF background with a deletion of OG1RF_10588 (PIP)                                                                                                                           | (2)               |
| OG1RF_10820-Tn                        | <i>E. faecalis</i> OG1RF OG1RF_10820 (LytR family response regulator) transposon mutant (Genomic position: 860054). Rf <sup>R</sup> , Fa <sup>R</sup> , Cm <sup>R</sup>         | (3)               |
| cscK-Tn                               | <i>E. faecalis</i> OG1RF OG1RF_10951 (fructosekinase) transposon mutant (Genomic position: 993104). Rf <sup>R</sup> , Fa <sup>R</sup> , Cm <sup>R</sup>                         | (3)               |
| OG1RF_12241-Tn                        | <i>E. faecalis</i> OG1RF OG1RF_12241 (LysR family transcriptional regulator) transposon mutant (Genomic position: 2363777). Rf <sup>R</sup> , Fa <sup>R</sup> , Cm <sup>R</sup> | (3)               |
| OG1RF_11710-Tn                        | <i>E. faecalis</i> OG1RF OG1RF_11710 (O-antigen polymerase) transposon mutant (Genomic position: 1789261). Rf <sup>R</sup> , Fa <sup>R</sup> , Cm <sup>R</sup>                  | (3)               |
| OG1RF_11714-Tn                        | <i>E. faecalis</i> OG1RF OG1RF_11714 (group 2 glycosyl transferase) transposon mutant (Genomic position: 1793746). Rf <sup>R</sup> , Fa <sup>R</sup> , Cm <sup>R</sup>          | (3)               |
| OG1RF_11715-Tn                        | <i>E. faecalis</i> OG1RF OG1RF_11715 ( <i>epaOX</i> , glycosyltransferase) transposon mutant (Genomic position: 1794475). Rf <sup>R</sup> , Fa <sup>R</sup> , Cm <sup>R</sup>   | (3)               |
| <i>ΔepaOX</i>                         | JD102; <i>E. faecalis</i> OG1RF <i>ΔepaOX</i> ( <i>ΔOG1RF_11715</i> , glycosyltransferase) markerless deletion. Rf <sup>R</sup> , Fa <sup>R</sup>                               | (4)               |
| OG1RF_12434-Tn                        | <i>E. faecalis</i> OG1RF OG1RF_12434 ( <i>mutL</i> ) locus transposon mutant (Genomic position: 2567339), Rf <sup>R</sup> , Fa <sup>R</sup> , Cm <sup>R</sup>                   | (3)               |
| OG1RF_12435-Tn                        | <i>E. faecalis</i> OG1RF OG1RF_12435 ( <i>mutS</i> ) locus transposon mutant (Genomic position: 2569574), Rf <sup>R</sup> , Fa <sup>R</sup> , Cm <sup>R</sup>                   | (3)               |
| Wild type - E                         | OG1RF strain carrying pAT28 empty vector                                                                                                                                        | This study        |

|                              |                                                                                                                                                                  |            |
|------------------------------|------------------------------------------------------------------------------------------------------------------------------------------------------------------|------------|
| <i>Δpip<sub>EF</sub></i> - E | <i>Δpip<sub>EF</sub></i> strain carrying pAT28 empty vector                                                                                                      | This study |
| OG1RF_10820-Tn<br>- E        | OG1RF_10820 transposon mutant carrying pAT28 empty vector. Rf <sup>R</sup> , Fa <sup>R</sup> , Cm <sup>R</sup> , Sp <sup>R</sup>                                 | This study |
| <i>cscK</i> -Tn - E          | OG1RF_10951 transposon mutant carrying pAT28 empty vector. Rf <sup>R</sup> , Fa <sup>R</sup> , Cm <sup>R</sup> , Sp <sup>R</sup>                                 | This study |
| OG1RF_12241-Tn<br>- E        | OG1RF_12241 transposon mutant carrying pAT28 empty vector. Rf <sup>R</sup> , Fa <sup>R</sup> , Cm <sup>R</sup> , Sp <sup>R</sup>                                 | This study |
| OG1RF_10820-Tn<br>- C        | OG1RF_10820 transposon mutant carrying pAT28 complementation vector. Rf <sup>R</sup> , Fa <sup>R</sup> , Cm <sup>R</sup> , Sp <sup>R</sup>                       | This study |
| <i>cscK</i> -Tn - C          | OG1RF_10951 transposon mutant carrying pAT28 complementation vector. Rf <sup>R</sup> , Fa <sup>R</sup> , Cm <sup>R</sup> , Sp <sup>R</sup>                       | This study |
| OG1RF_12241-Tn<br>- C        | OG1RF_12241 transposon mutant carrying pAT28 complementation vector. Rf <sup>R</sup> , Fa <sup>R</sup> , Cm <sup>R</sup> , Sp <sup>R</sup>                       | This study |
| <i>mutL</i> -Tn - E          | OG1RF_12434 ( <i>mutL</i> ) locus transposon mutant carrying pAT28 empty vector. Rf <sup>R</sup> , Fa <sup>R</sup> , Cm <sup>R</sup> , Sp <sup>R</sup>           | This study |
| <i>mutS</i> -Tn - E          | OG1RF_12435 ( <i>mutS</i> ) locus transposon mutant carrying pAT28 empty vector. Rf <sup>R</sup> , Fa <sup>R</sup> , Cm <sup>R</sup> , Sp <sup>R</sup>           | This study |
| <i>mutL</i> -Tn - C          | OG1RF_12434 ( <i>mutL</i> ) locus transposon mutant carrying pAT28 complementation vector. Rf <sup>R</sup> , Fa <sup>R</sup> , Cm <sup>R</sup> , Sp <sup>R</sup> | This study |
| <i>mutS</i> -Tn - C          | OG1RF_12435 ( <i>mutS</i> ) locus transposon mutant carrying pAT28 complementation vector. Rf <sup>R</sup> , Fa <sup>R</sup> , Cm <sup>R</sup> , Sp <sup>R</sup> | This study |
| <i>mutL</i> -Tn-NPh_C1       | <i>mutL</i> -Tn colony # 1 selected from O/N THB agar plate. Rf <sup>R</sup> , Fa <sup>R</sup> , Cm <sup>R</sup>                                                 | This study |
| <i>mutL</i> -Tn-NPh_C2       | <i>mutL</i> -Tn colony # 2 selected from O/N THB agar plate. Rf <sup>R</sup> , Fa <sup>R</sup> , Cm <sup>R</sup>                                                 | This study |
| <i>mutL</i> -Tn-NPh_C3       | <i>mutL</i> -Tn colony # 3 selected from O/N THB agar plate. Rf <sup>R</sup> , Fa <sup>R</sup> , Cm <sup>R</sup>                                                 | This study |
| <i>mutL</i> -Tn-NPh_C4       | <i>mutL</i> -Tn colony # 4 selected from O/N THB agar plate. Rf <sup>R</sup> , Fa <sup>R</sup> , Cm <sup>R</sup>                                                 | This study |
| <i>mutL</i> -Tn-Ph_C1        | <i>mutL</i> -Tn colony # 1 selected from O/N THB agar plate containing VPE25. Rf <sup>R</sup> , Fa <sup>R</sup> , Cm <sup>R</sup>                                | This study |
| <i>mutL</i> -Tn-Ph_C2        | <i>mutL</i> -Tn colony # 2 selected from O/N THB agar plate containing VPE25. Rf <sup>R</sup> , Fa <sup>R</sup> , Cm <sup>R</sup>                                | This study |

|                        |                                                                                                                                   |            |
|------------------------|-----------------------------------------------------------------------------------------------------------------------------------|------------|
| <i>mutL</i> -Tn-Ph_C3  | <i>mutL</i> -Tn colony # 3 selected from O/N THB agar plate containing VPE25. Rf <sup>R</sup> , Fa <sup>R</sup> , Cm <sup>R</sup> | This study |
| <i>mutL</i> -Tn-Ph_C4  | <i>mutL</i> -Tn colony # 4 selected from O/N THB agar plate containing VPE25. Rf <sup>R</sup> , Fa <sup>R</sup> , Cm <sup>R</sup> | This study |
| <i>mutS</i> -Tn-NPh_C1 | <i>mutS</i> -Tn colony # 1 selected from O/N THB agar plate. Rf <sup>R</sup> , Fa <sup>R</sup> , Cm <sup>R</sup>                  | This study |
| <i>mutS</i> -Tn-NPh_C2 | <i>mutS</i> -Tn colony # 2 selected from O/N THB agar plate. Rf <sup>R</sup> , Fa <sup>R</sup> , Cm <sup>R</sup>                  | This study |
| <i>mutS</i> -Tn-NPh_C3 | <i>mutS</i> -Tn colony # 3 selected from O/N THB agar plate. Rf <sup>R</sup> , Fa <sup>R</sup> , Cm <sup>R</sup>                  | This study |
| <i>mutS</i> -Tn-NPh_C4 | <i>mutS</i> -Tn colony # 4 selected from O/N THB agar plate. Rf <sup>R</sup> , Fa <sup>R</sup> , Cm <sup>R</sup>                  | This study |
| <i>mutS</i> -Tn-Ph_C1  | <i>mutS</i> -Tn colony # 1 selected from O/N THB agar plate containing VPE25. Rf <sup>R</sup> , Fa <sup>R</sup> , Cm <sup>R</sup> | This study |
| <i>mutS</i> -Tn-Ph_C2  | <i>mutS</i> -Tn colony # 2 selected from O/N THB agar plate containing VPE25. Rf <sup>R</sup> , Fa <sup>R</sup> , Cm <sup>R</sup> | This study |
| <i>mutS</i> -Tn-Ph_C3  | <i>mutS</i> -Tn colony # 3 selected from O/N THB agar plate containing VPE25. Rf <sup>R</sup> , Fa <sup>R</sup> , Cm <sup>R</sup> | This study |
| <i>mutS</i> -Tn-Ph_C4  | <i>mutS</i> -Tn colony # 4 selected from O/N THB agar plate containing VPE25. Rf <sup>R</sup> , Fa <sup>R</sup> , Cm <sup>R</sup> | This study |

---

### ***Escherichia coli***

|     |                                                                                                       |         |
|-----|-------------------------------------------------------------------------------------------------------|---------|
| TG1 | [ <i>F'</i> <i>traD36 proAB lacIqZ ΔM15</i> ] <i>supE thi-1 Δ(lac-proAB) Δ(mcrBhsdSM)5(rK - mK -)</i> | Lucigen |
|-----|-------------------------------------------------------------------------------------------------------|---------|

---

### **Phage**

|       |                                  |     |
|-------|----------------------------------|-----|
| VPE25 | Siphoviridae; Wastewater isolate | (2) |
| NPV1  | Siphoviridae; Wastewater isolate | (5) |

---

### **Plasmids**

|                    |                                                                                                     |            |
|--------------------|-----------------------------------------------------------------------------------------------------|------------|
| pAT28              | <i>Escherichia coli</i> and in Gram-positive bacteria shuttle vector; Sp <sup>R</sup>               | (6)        |
| pAT28: OG1RF_10820 | pAT28 expressing OG1RF_10820 from the native promoter. Cloned into SacI/BamHI site. Sp <sup>R</sup> | This study |
| pAT28: <i>cscK</i> | pAT28 expressing <i>cscK</i> from the native promoter. Cloned into SacI/BamHI site. Sp <sup>R</sup> | This study |

|                       |                                                                                                     |            |
|-----------------------|-----------------------------------------------------------------------------------------------------|------------|
| pAT28:<br>OG1RF_12241 | pAT28 expressing OG1RF_12241 from the native promoter. Cloned into SacI/BamHI site. Sp <sup>R</sup> | This study |
| pAT28: <i>mutL</i>    | pAT28 expressing <i>mutL</i> from the native promoter. Cloned into SacI/XbaI site. Sp <sup>R</sup>  | This study |
| pAT28: <i>mutS</i>    | pAT28 expressing <i>mutS</i> from the native promoter. Cloned into SacI/EcoRI site. Sp <sup>R</sup> | This study |

---

### Primers

---

|                |                                                                                                              |            |
|----------------|--------------------------------------------------------------------------------------------------------------|------------|
| <i>lytR</i> -F | NNNNNNGAGCTCACAGTTATTTTTTTTGGTTGGTGTTA<br>C; Forward primer to generate pAT28:OG1RF_10820; SacI site         | This study |
| <i>lytR</i> -R | NNNNNNGGATCCGAATCTATGTTATAACTAACATCATT<br>G; Reverse primer to generate pAT28:OG1RF_10820; BamHI site        | This study |
| <i>cscK</i> -F | NNNNNNGAGCTCTCATTGTTAGATAACCGTGAATGCT<br>C; Forward primer to generate pAT28: <i>cscK</i> ; SacI site        | This study |
| <i>cscK</i> -R | NNNNNNGGATCCTCATTCTTAGCCATTTCTTCAAAT;<br>Reverse primer to generate pAT28: <i>cscK</i> ; BamHI site          | This study |
| <i>lysR</i> -F | NNNNNNGAGCTCTCGCCTCCTTTTGCTAAATTTATCG;<br>Forward primer to generate pAT28:OG1RF_12241; SacI site            | This study |
| <i>lysR</i> -R | NNNNNNGGATCCAGTATTCAACGACCTATTATTTCAG;<br>Reverse primer to generate pAT28:OG1RF_12241; BamHI site           | This study |
| <i>mutS</i> -F | NNNNNNGAGCTCCCTCCTAACCGGTTCCGGTTCCTAAT<br>TAGA; Forward primer to generate pAT28: <i>mutS</i> ; SacI site    | This study |
| <i>mutS</i> -R | NNNNNNGAATTCGAAGAAAAGTTAATCTCGGATCATT<br>AAGAGG; Reverse primer to generate pAT28: <i>mutS</i> ; EcoRI site  | This study |
| <i>mutL</i> -F | NNNNNNGAGCTCAATGATGACGCCTCGTTTCTTTTAA<br>ATGGG; Forward primer to generate pAT28: <i>mutL</i> ; SacI site    | This study |
| <i>mutL</i> -R | NNNNNNTCTAGAAGGAACCGAACCGGTTAGGAGGTC<br>GTGAAATGG; Reverse primer to generate pAT28: <i>mutL</i> ; XbaI site | This study |

|                     |                                                                  |            |
|---------------------|------------------------------------------------------------------|------------|
| RT- <i>fsrA</i> -F  | GCAGGATTTGAGGTTGCTAAAG; qPCR forward primer for <i>fsrA</i>      | This study |
| RT- <i>fsrA</i> -R  | GAGCTGAAACCATATATTTGTAGGAAG; qPCR reverse primer for <i>fsrA</i> | This study |
| RT- <i>fsrBD</i> -F | TCTTCTGTGAGCTTACCGTTTATT; qPCR forward primer for <i>fsrBD</i>   | This study |
| RT- <i>fsrBD</i> -R | CAGGTTCAATTGCTGTTCCCTTG; qPCR reverse primer for <i>fsrBD</i>    | This study |
| RT- <i>fsrC</i> -F  | TAACGAAGAGCTAGCGATGTTT; qPCR forward primer for <i>fsrC</i>      | This study |
| RT- <i>fsrC</i> -R  | GGTTGGTGCAATCGTTTCTTC; qPCR reverse primer for <i>fsrC</i>       | This study |
| RT- <i>gelE</i> -F  | CGCCATCACTAGCGACATTA; qPCR forward primer for <i>gelE</i>        | This study |
| RT- <i>gelE</i> -R  | GGCATCCCTCGATCATCAATAC; qPCR reverse primer for <i>gelE</i>      | This study |
| RT- <i>sprE</i> -F  | AGAAGACAAGAAGTGGCAGATAC; qPCR forward primer for <i>sprE</i>     | This study |
| RT- <i>sprE</i> -R  | CAACAACAAAGCCTGTTCCCTAAA; qPCR reverse primer for <i>sprE</i>    | This study |
| RT-10296 -F         | GCTTCACCAGGCTCCATTATAG; qPCR forward primer for OG1RF_10296      | This study |
| RT-10296 -R         | TGACTGCGGATACTGCAAAG; qPCR reverse primer for OG1RF_10296        | This study |
| RT-10297 -F         | TGTGTTGAGCCCGCTTATATC; qPCR forward primer for OG1RF_10297       | This study |
| RT-10297 -R         | TGGCTTCTTCTGTTCCATGAG; qPCR reverse primer for OG1RF_10297       | This study |
| RT-10875 -F         | GACTGTATTACGCTTCGCTAAAG; qPCR forward primer for OG1RF_10875     | This study |
| RT-10875 -R         | CCACATTGAACTGCCATAAA; qPCR reverse primer for OG1RF_10875        | This study |
| RT-10876 -F         | TGTGGGCTAAGCTAATGAATTT; qPCR forward primer for OG1RF_10876      | This study |

|                     |                                                               |            |
|---------------------|---------------------------------------------------------------|------------|
| RT-10876 -R         | AGTTCTCCTGAATCTATCCAAGTA; qPCR reverse primer for OG1RF_10876 | This study |
| RT- <i>eutB</i> -F  | CAATGGAAGCGCGTTGTTATG; qPCR forward primer for <i>eutB</i>    | This study |
| RT- <i>eutB</i> -R  | AGCGCGGATGACTTGTTT; qPCR reverse primer for <i>eutB</i>       | This study |
| RT- <i>eutC</i> -F  | CAGCTGCTATCGAAGCGAATA; qPCR forward primer for <i>eutC</i>    | This study |
| RT- <i>eutC</i> -R  | TTGCTGGCACACGACAATA; qPCR reverse primer for <i>eutC</i>      | This study |
| RT- <i>eutH</i> -F  | TAGCTGGCGCTTTCTGTTTAG; qPCR forward primer for <i>eutH</i>    | This study |
| RT- <i>eutH</i> -R  | AGCCGCTACTTCATTCATTCC; qPCR reverse primer for <i>eutH</i>    | This study |
| RT- <i>epaA</i> -F  | GCAGGAGGACTTGCAATCTA; qPCR forward primer for <i>epaA</i>     | This study |
| RT- <i>epaA</i> -R  | ACCATTCCACCAGCCAAA; qPCR reverse primer for <i>epaA</i>       | This study |
| RT- <i>epaE</i> -F  | AGGGATCAAACCGTCAGAAC; qPCR forward primer for <i>epaA</i>     | This study |
| RT- <i>epaE</i> -R  | GGCCCATTACCTCAACAGAA; qPCR reverse primer for <i>epaA</i>     | This study |
| RT- <i>epaOX</i> -F | CCACGTTAACTCGTGCAGTA; qPCR forward primer for <i>epaOX</i>    | This study |
| RT- <i>epaOX</i> -R | CCACTGTCATCAGAAGAACCA; qPCR reverse primer for <i>epaOX</i>   | This study |
| RT- 11714 -F        | GGAAGCATTACCGCTTCTAAGT; qPCR forward primer for OG1RF_11714   | This study |
| RT- 11714 -R        | ATGCAAGGTCGCTATATTCTGG; qPCR reverse primer for OG1RF_11714   | This study |
| RT- 11710 -F        | GTGTATGGTTTGTCTTAGCGTTAG; qPCR forward primer for OG1RF_11710 | This study |
| RT- 11710 -R        | TCGGCCTTCATAGAAACCTATAC; qPCR reverse primer for OG1RF_11710  | This study |

|              |                                                              |            |
|--------------|--------------------------------------------------------------|------------|
| RT- 11100 -F | AAGGGCAAGCATTTC AAGCG; qPCR forward primer for OG1RF_11100   | This study |
| RT- 11100 -R | TCTTGACGGTCACGTTCTGC; qPCR reverse primer for OG1RF_11100    | This study |
| RT- 11101 -F | CCAATGGCTTGGCAACTGAC; qPCR forward primer for OG1RF_11101    | This study |
| RT- 11101 -R | GCGAACGAACGTGCATTTTG; qPCR reverse primer for OG1RF_11101    | This study |
| RT- 11104 -F | GGGAATGGCACCCCTGAAAGA; qPCR forward primer for OG1RF_11104   | This study |
| RT- 11104 -R | CTTCGCGCTTGGCTTTTTGA; qPCR reverse primer for OG1RF_11104    | This study |
| RT- 11105 -F | TTGGAAAGGTGGCGGAATAG; qPCR forward primer for OG1RF_11105    | This study |
| RT- 11105 -R | TCTGCTTTGATACTGGCTAAGG; qPCR reverse primer for OG1RF_11105  | This study |
| RT- 11109 -F | GCTTTGGAGAACGCTGAACG; qPCR forward primer for OG1RF_11109    | This study |
| RT- 11109 -R | TTTTGACAGTCTTGGCGCTCG; qPCR reverse primer for OG1RF_11109   | This study |
| RT- 11115 -F | CTCAACCGGATCGTGCTTATT; qPCR forward primer for OG1RF_11115   | This study |
| RT- 11115 -R | CCTTGGTAGCGAATGGATCATAG; qPCR reverse primer for OG1RF_11115 | This study |
| RT-16S -F    | CGCTTCTTTCCTCCCGAGT; qPCR forward primer 16S rRNA gene       | This study |
| RT-16S -F    | GCCATGCGGCATAAACTG; qPCR reverse primer 16S rRNA gene        | This study |

---

Cm<sup>R</sup> - chloramphenicol resistant; Rf<sup>R</sup> - rifampicin resistance; Fa<sup>R</sup> - fusidic acid resistance; SpR - spectinomycin resistance; Restriction enzyme sites are underlined

## References

1. Bourgogne A, Garsin DA, Qin X, Singh KV, Sillanpaa J, Yerrapragada S, Ding Y, Dugan-Rocha S, Buhay C, Shen H, Chen G, Williams G, Muzny D, Maadani A, Fox KA, Gioia J, Chen L, Shang Y, Arias CA, Nallapareddy SR, Zhao M, Prakash VP, Chowdhury S, Jiang H, Gibbs RA, Murray BE, Highlander SK, Weinstock GM. 2008. Large scale variation in *Enterococcus faecalis* illustrated by the genome analysis of strain OG1RF. *Genome Biol* 9:R110. doi:10.1186/gb-2008-9-7-r110.
2. Duerkop BA, Huo W, Bhardwaj P, Palmer KL, Hooper LV. 2016. Molecular basis for lytic bacteriophage resistance in enterococci. *MBio* 7. doi:10.1128/mBio.01304-16.
3. Dale JL, Beckman KB, Willett JLE, Nilson JL, Palani NP, Baller JA, Hauge A, Gohl DM, Erickson R, Manias DA, Sadowsky MJ, Dunny GM. 2018. Comprehensive functional analysis of the *Enterococcus faecalis* core genome using an ordered, sequence-defined collection of insertional mutations in strain OG1RF. *mSystems* 3. doi:10.1128/mSystems.00062-18.
4. Dale JL, Cagnazzo J, Phan CQ, Barnes AM, Dunny GM. 2015. Multiple roles for *Enterococcus faecalis* glycosyltransferases in biofilm-associated antibiotic resistance, cell envelope integrity, and conjugative transfer. *Antimicrob Agents Chemother* 59:4094-105. doi:10.1128/AAC.00344-15.
5. Trotter KM, Dunny GM. 1990. Mutants of *Enterococcus faecalis* deficient as recipients in mating with donors carrying pheromone-inducible plasmids. *Plasmid* 24:57-67.
6. Trieu-Cuot P, Carlier C, Poyart-Salmeron C, Courvalin P. 1990. A pair of mobilizable shuttle vectors conferring resistance to spectinomycin for molecular cloning in



*Escherichia coli* and in Gram-positive bacteria. Nucleic Acids Res 18:4296.

doi:10.1093/nar/18.14.4296.
